# Supplementary material for: Functional Analysis of Spike from SARS-CoV-2 Variants Reveals the Role of Distinct Mutations in Neutralization Potential and Viral Infectivity
Source: MDPI journal article supplement (doi:10.3390/v14040803), 2022-04-13
Supplement: s1 [file s1]

Supplementary Materials

# Functional Analysis of Spike from SARS-CoV-2 Variants Reveals the Role of Distinct Mutations in Neutralization Potential and Viral Infectivity

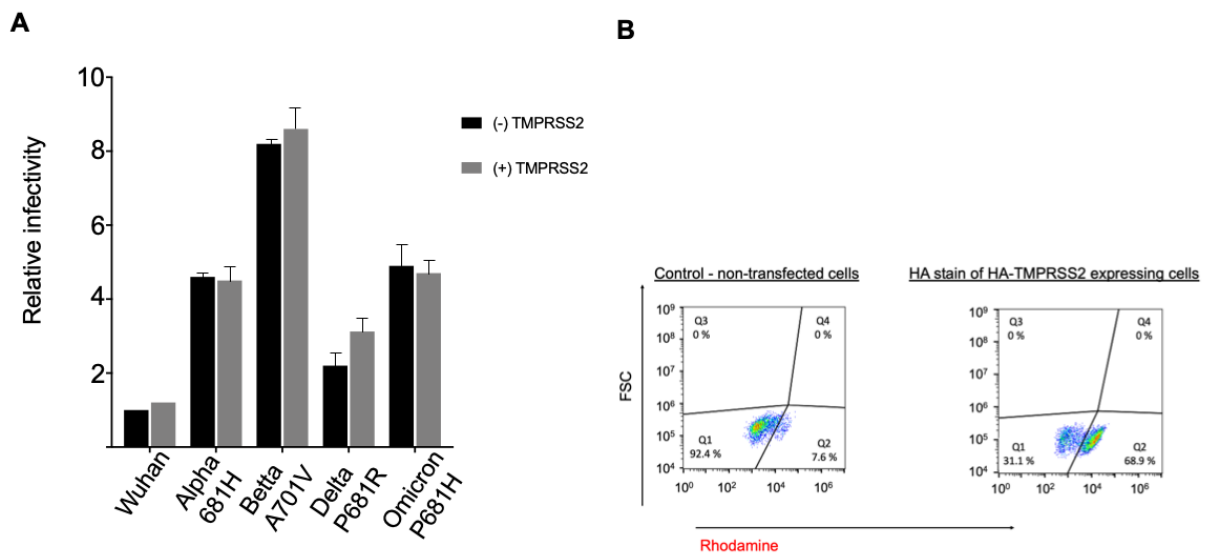

**Figure S1.** TMPRSS2 does play role in viral infectivity of pseudoviruses that infect HEK-293T-ACE2-TMPRSS2 cells.

(A) Pseudoviruses bearing the indicated SARS-CoV-2 spike mutations were used to transduce HEK-ACE2 cells and HEK cells that express TMPRSS2. The human protease was transfected into cells 48 hr earlier and its expression was verified in infected cells by FACS analysis (B). Equal viral loads were normalized based on p24 protein levels. 48 hr post transduction, cells were harvested and their luciferase readouts were monitored. Bar graphs show mean values  $\pm$  SD error bars of three independent experiments. Measured statistical significance was calculated between experiments by a two-tailed Student's *t* test.
